# Supplementary material for: Minimizing the Risk of Disease Transmission in Emergency Settings: Novel In Situ Physico-Chemical Disinfection of Pathogen-Laden Hospital Wastewaters
Source: PLOS journal article supplement (doi:10.1371/journal.pntd.0003776), 2015-06-25
Supplement: S1 (10.1371/journal.pntd.0003776.s001) [file journal.pntd.0003776.s001]

|                                                                                          |                                                   |                                         |                                    |                                   |
|------------------------------------------------------------------------------------------|---------------------------------------------------|-----------------------------------------|------------------------------------|-----------------------------------|
| Disinfection method →                                                                    | Superchlorination with HTH (Calcium hypochlorite) | Superchlorination with NaDCC (Klorsept) | High pH physico-chemical treatment | Low pH physico-chemical treatment |
| Cost for the disinfection of 1 m <sup>3</sup> of pathogen-laden hospital wastewaters [€] | 21.6                                              | 14.4                                    | 6.5                                | 1.3                               |
